# Supplementary material for: Degradation of a chloroacetanilide herbicide in natural waters using UV activated hydrogen peroxide, persulfate and peroxymonosulfate processes
Source: Royal Society of Chemistry journal article supplement (doi:10.1039/d0ew00358a), 2020-01-01
Supplement: d0ew00358a1.pdf [file d0ew00358a1.pdf]

### SUPPLEMENTARY MATERIAL

**Table S1.** Chemical properties of alachlor

| Molecular Formula                                 | Chemical structure                                                                | Molecular weight (g mol <sup>-1</sup> ) | Water solubility (mg L <sup>-1</sup> , at 20°C) | logK <sub>ow</sub> | pK <sub>a</sub> , at 25°C |
|---------------------------------------------------|-----------------------------------------------------------------------------------|-----------------------------------------|-------------------------------------------------|--------------------|---------------------------|
| C <sub>14</sub> H <sub>20</sub> ClNO <sub>2</sub> | 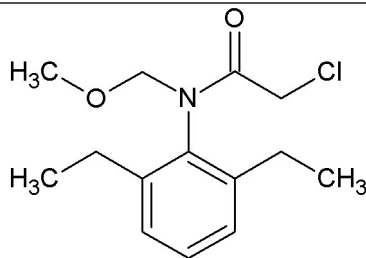 | 269.77                                  | 240                                             | 3.52               | 0.62                      |

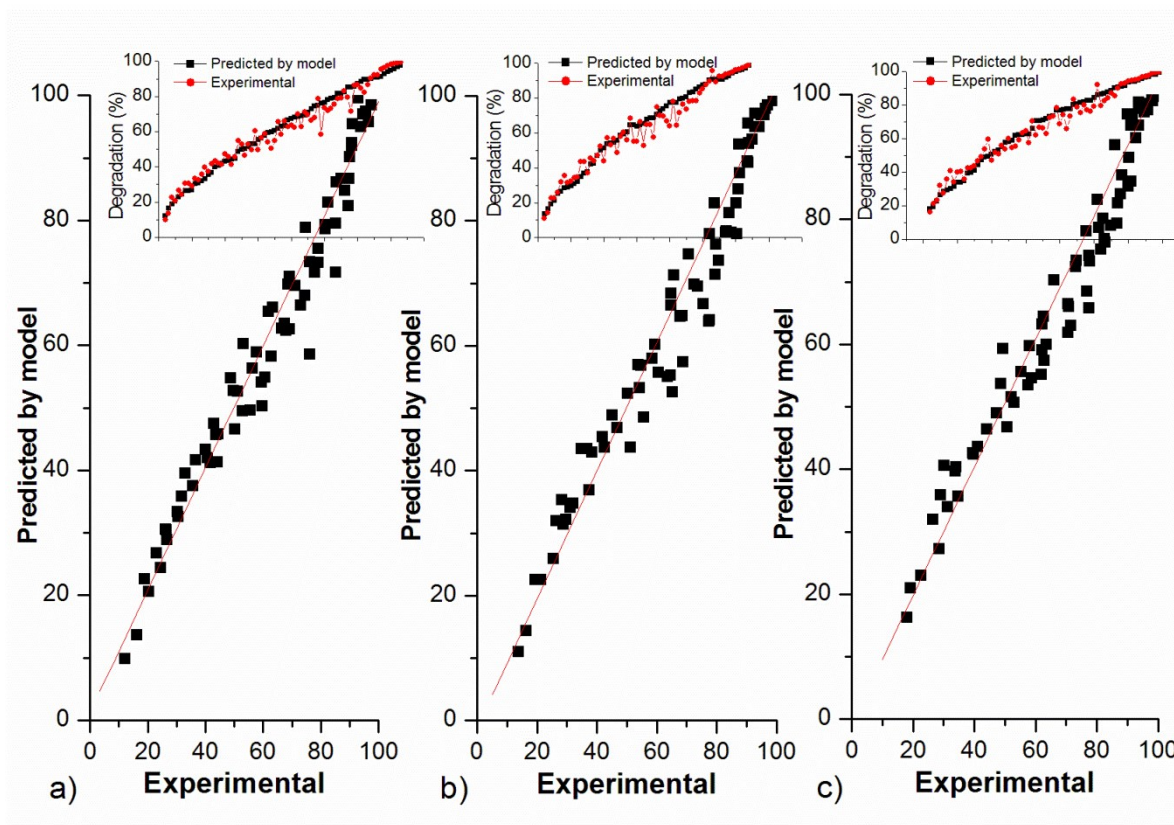

**Figure S1.** Correlation between the experimental and the predicted values in a regression model for: (a) UV/H<sub>2</sub>O<sub>2</sub> (b) UV/S<sub>2</sub>O<sub>8</sub><sup>2-</sup> and (c) UV/HSO<sub>5</sub><sup>-</sup> processes
